# Supplementary material for: The head mesodermal cell couples FMRFamide neuropeptide signaling with rhythmic muscle contraction in C. elegans
Source: PubMed Central journal article supplement (PMC10349088; doi:10.1038/s41467-023-39955-8), 2023-07-14
Supplement: 41467_2023_39955_MOESM1_ESM.pdf [file 41467_2023_39955_MOESM1_ESM.pdf]

**The head mesodermal cell couples FMRFamide neuropeptide signaling with muscle contraction during a rhythmic behavior in *C. elegans***

Ukjin Choi, Mingxi Hu, Qixin Zhang, and Derek Sieburth

Derek Sieburth  
Email: [sieburth@usc.edu](mailto:sieburth@usc.edu)

**Supplementary Information:**

Supplementary Figure 1 to Figure 8  
Supplementary Table 1 to Table 2  
Supplementary References

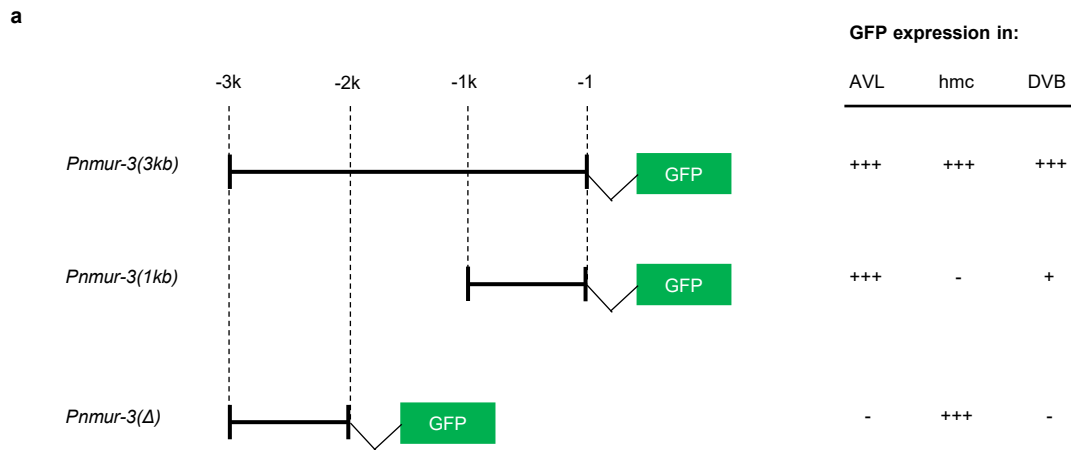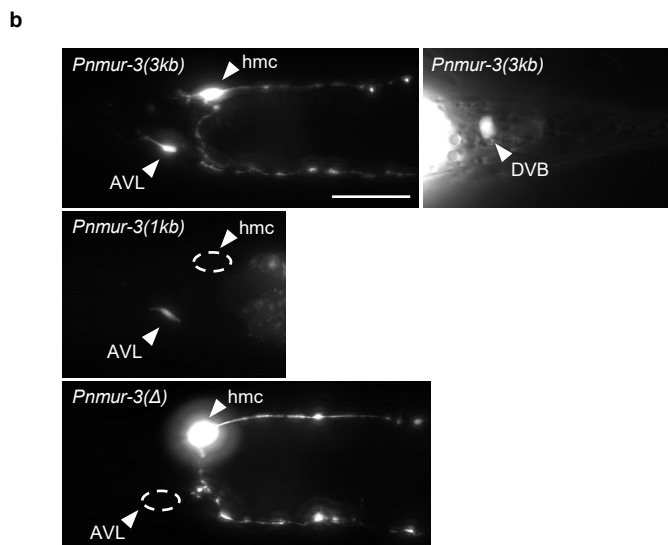

**Supplementary Figure 1: Analysis of the expression patterns of *nmur-3* promoter fragments.** **a** Schematic of the *nmur-3* promoter. The *Pnmur-3(3kb)* promoter fragment extends from -1bp to -2956bp relative to the ATG codon of *nmur-3*, and drives expression of GFP in AVL, DVB and hmc. The *Pnmur-3(1kb)* promoter fragment extends from -1bp to -1053 bp relative to the ATG codon of *nmur-3*, and drives GFP expression in AVL but not in hmc. The *Pnmur-3(Δ)* promoter fragment extends from -2026 bp to -2956 bp and drives GFP expression primarily in hmc but not in AVL. +++ indicates that 80-100% of animals exhibited fluorescence in the indicated cell, + indicates that <10% of animals exhibited fluorescence in the indicated cell, and - indicates that 0% of animals exhibited fluorescence in the indicated cell. At least 20 animals were examined for each transgenic line. **b** Representative images of adults from the transgenic lines described in **a**. Scale bar, 40  $\mu$ m.

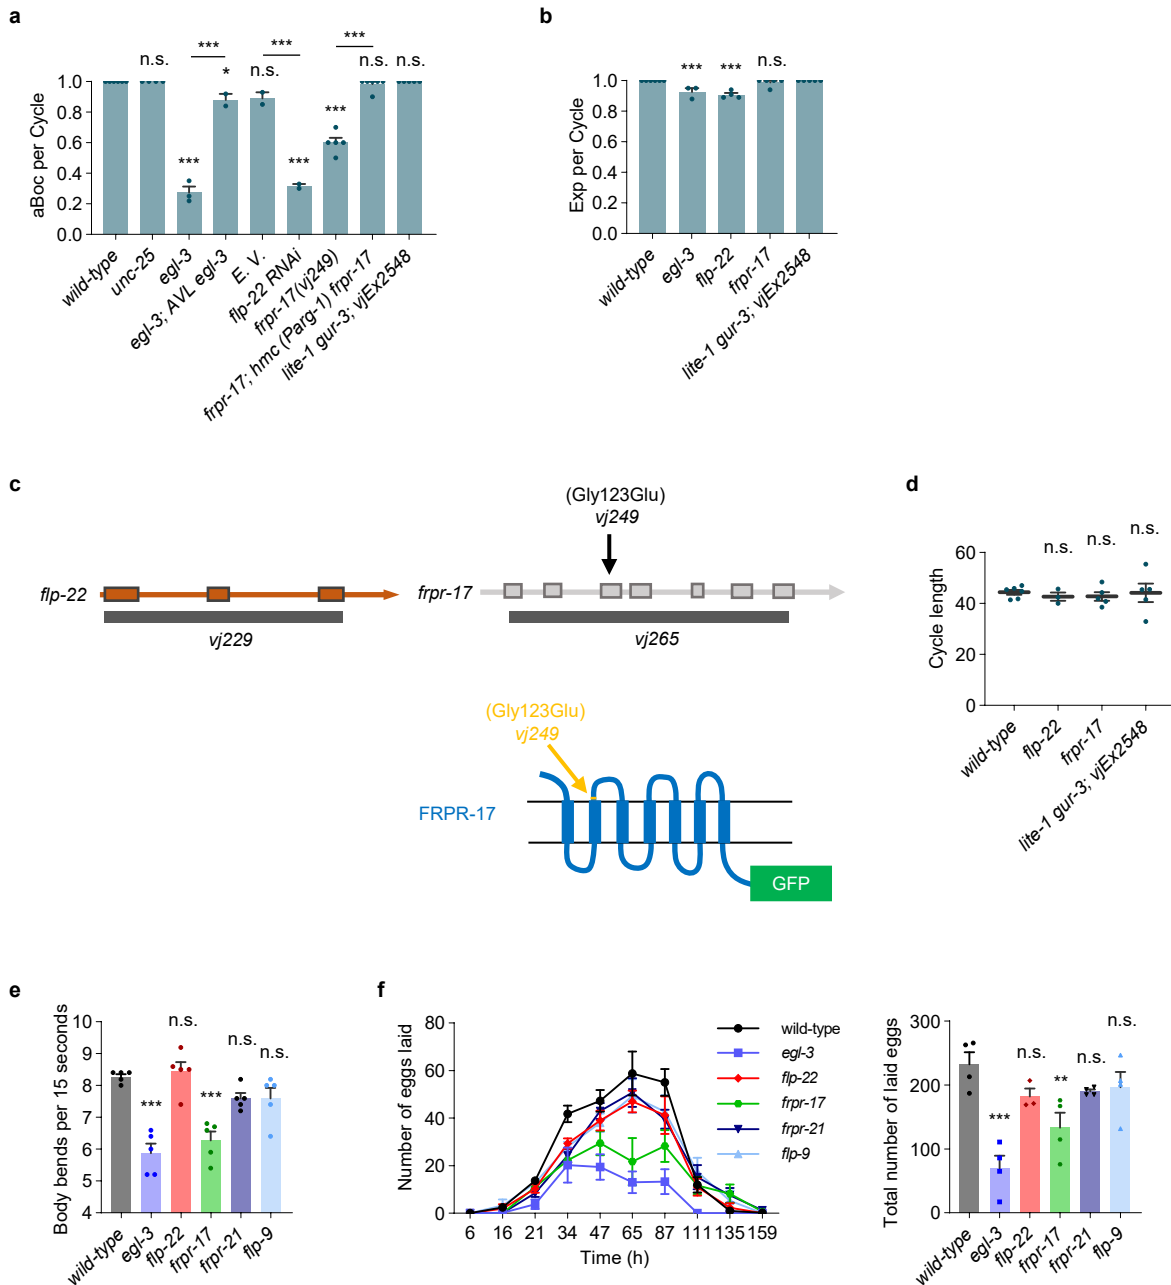

**Supplementary Figure 2: Phenotypic analysis of *flp-22* and *frpr-17* mutants.** **a** Quantification of the number of aBocs per cycle in adult animals of the indicated genotypes. “AVL *egl-3*” denotes *egl-3* cDNA expressed in AVL using the *nmur-3(1kb)* promoter. “*hmc (Parg-1) frpr-17*” denotes *frpr-17* cDNA expressed in *hmc* using the *arg-1* promoter. *vjEx2548* is the GCaMP imaging strains used in this study. Data are presented as mean values  $\pm$  SEM.  $n = 6, 4, 3, 2, 2, 2, 5, 6, 5$  independent animals. \*\*\*  $P < 0.001$  and \*  $P < 0.05$  in one-way ANOVA with Bonferroni’s correction for multiple comparisons; n.s., not significant. **b** Quantification of expulsion (Exp) frequency in the indicated genotypes. Data are presented as mean values  $\pm$  SEM.  $n = 6, 3, 4, 5, 5$  independent animals. \*\*\*  $P < 0.001$  in one-way ANOVA with Dunnett’s correction for multiple comparisons; n.s., not significant. **c** *Top, left*: genomic organization of the *flp-22* locus showing the location and lesion of *vj229* allele. *Top, right*: genomic organization of the *frpr-17* locus showing the locations and the lesions of the *vj249* and *vj265* alleles. *vj249* is a glycine to glutamic acid substitution in exon 3. *Bottom*: diagram showing the predicted structure of the FRPR-17 protein and the position of the amino acid substitution in the extracellular domain in the *vj249* mutant. **d** Quantification of cycle lengths in the indicated genotypes. Data are presented as mean values  $\pm$  SEM.  $n = 6, 3, 5, 5$  independent animals. One-way ANOVA with Dunnett’s correction for multiple comparisons; n.s., not significant. **e** Locomotion, measured by body bends per minute, of young adult animals of the indicated genotypes. Data are presented as mean values  $\pm$  SEM.  $n = 5$  independent animals. \*\*\*  $P < 0.001$  in one-way ANOVA with Dunnett’s correction for multiple comparisons; n.s., not significant. **f** Egg laying rates and total number of eggs laid in the indicated genotypes. Data are presented as mean values  $\pm$  SEM.  $n = 4, 4, 3, 4, 4, 4$  independent animals. \*\*\*  $P < 0.001$  and \*\*  $P < 0.01$  one-way ANOVA with Dunnett’s correction for multiple comparisons; n.s., not significant.

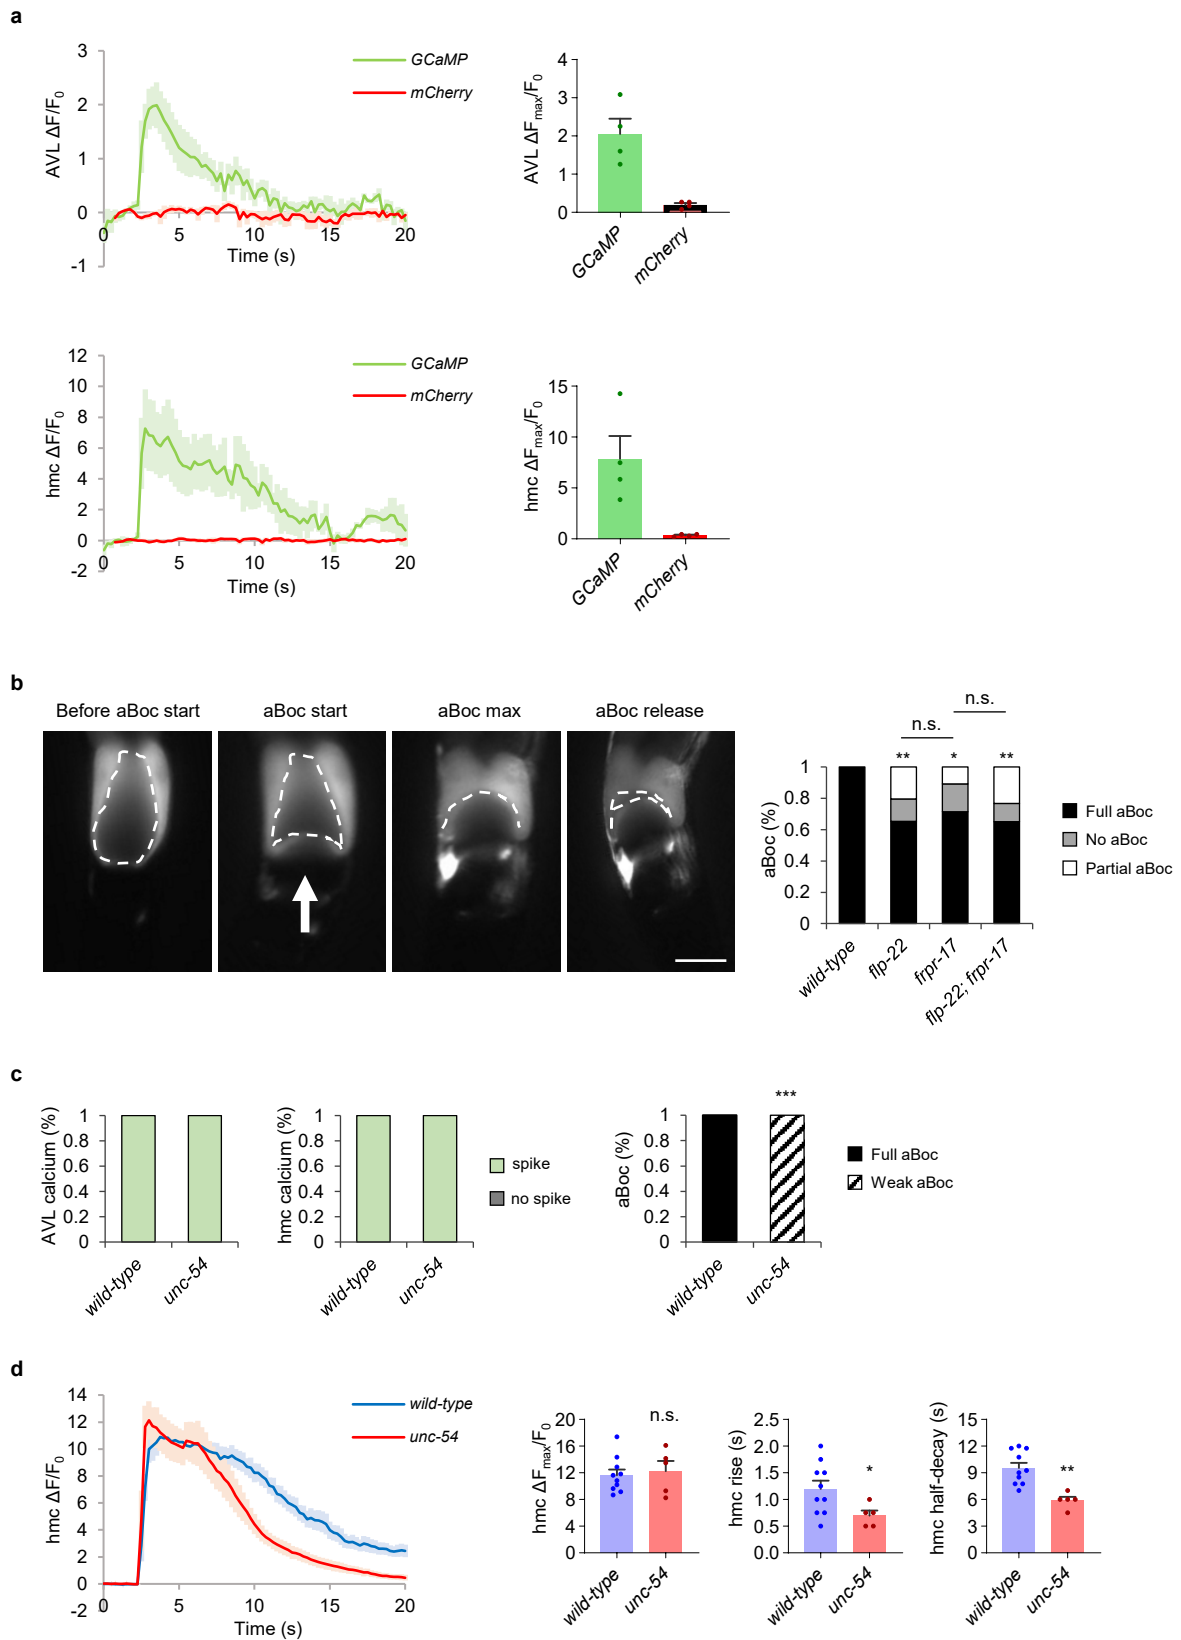

**Supplementary Figure 3: Movement has minimal impact on GCaMP fluorescence intensity, aBoc can be detected using time lapse images, and muscles do not activate hmc.** **a** *Left*: average traces of fluorescence intensity in AVL or hmc in animals co-expressing GCaMP and mCherry. Each trace is aligned to the calcium spike initiation time, and the solid lines indicate average fold change in fluorescence intensity and the shades indicate SEM. *Right*: quantification of the average peak amplitude of CGaMP and mCherry. Data are presented as mean values  $\pm$  SEM.  $n = 4$  cycles from different animals. **b** *Left*: representative images from the live calcium imaging showing contractions of the neck muscle. Posterior is up and dorsal is to the left in these images. The lumen of the anterior intestine is outlined with a white dotted line. The lumen of the intestine begins to displace posteriorly at the initiation of aBoc (arrow) and reaches maximum displacement after about one second before beginning to relax. Similar expression patterns were observed in all 10 animals examined. Scale bar, 40  $\mu$ m. *Right*: in wild-type animals, the duration of the maximal aBoc contraction is at least 500 ms (full aBoc). In the indicated mutants, the maximal displacement is not reached or it is less than 500 ms in about 30% of cycles (partial and no aBoc). \*\*  $P < 0.01$  and \*  $P < 0.05$  in two-sided chi-square test with Bonferroni's correction for multiple comparisons; n.s., not significant. **c** Calcium spike frequency in AVL and hmc and aBoc frequency in *unc-54*/myosin mutants from time lapse imaging. "Weak aBoc" denotes a contraction with a very little movement due to compromised muscle function. Wild-type: 33 cycles in 8 animals, *unc-54*: 10 cycles in 3 animals \*\*\*  $P < 0.001$  in two-sided Fisher's exact test. **d** *Left*: average traces of calcium dynamics in hmc in the indicated genotypes. Each trace is aligned to the calcium spike initiation time and the solid lines indicate average fold change in fluorescence intensity and the shades indicate SEM. *Right*: quantification of the average peak amplitude, rise time, and half-decay time of CGaMP. Data are presented as mean values  $\pm$  SEM.  $n = 10$ , 5 cycles from different animals. \*\*  $P < 0.01$  and \*  $P < 0.05$  in two-tailed Student's t-test; n.s., not significant.

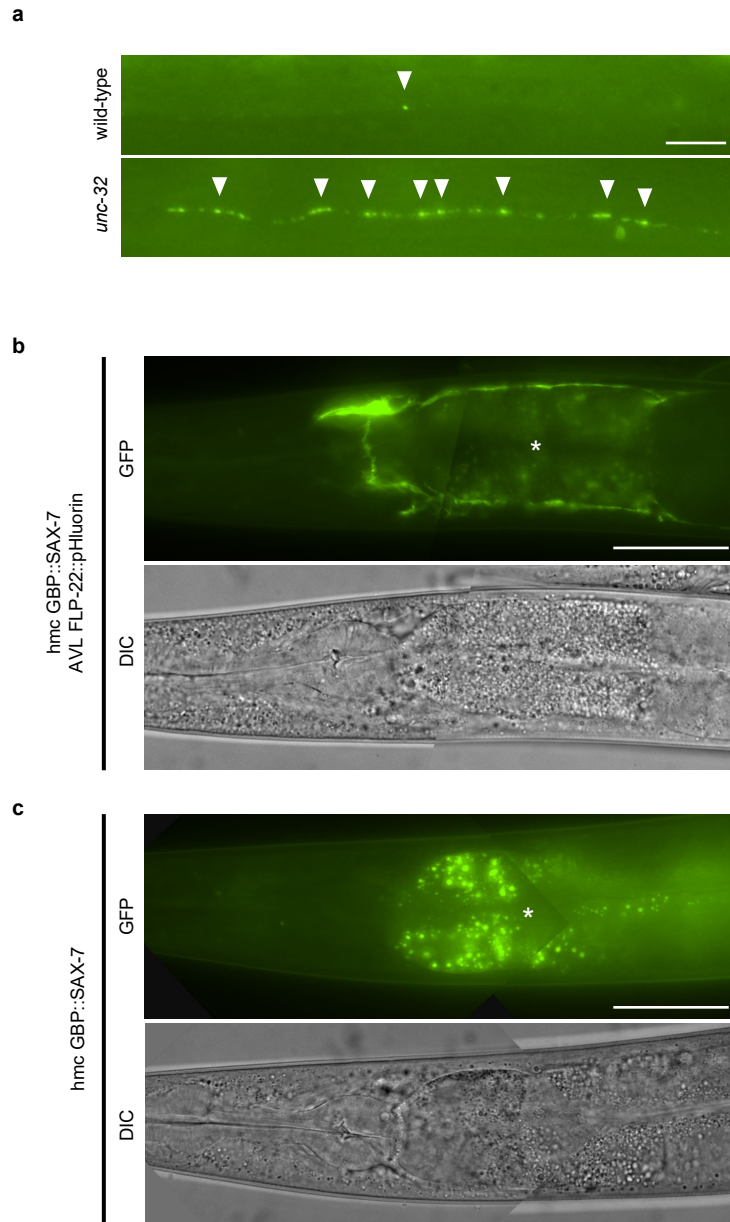

**Supplementary Figure 4: FLP-22 secreted from AVL can reach hmc.** **a** Representative image of the proximal AVL axon of adults expressing FLP-22::pHluorin in AVL in the indicated genotypes. Arrowheads denote clusters of DCVs visible in the proximal axon containing unquenched FLP-22::pHluorin. Similar expression patterns were observed in all 25 animals examined for each genotype. Scale bar, 20  $\mu$ m. **b** Representative images of adults co-expressing FLP-22::pHluorin in AVL and GBP::SAX-7 in hmc. Fluorescence is observed on the surface of hmc, indicating that FLP-22::pHluorin was secreted from AVL and is associated with hmc through interaction with the GFP binding domain of GBP::SAX-7. Similar expression patterns were observed in all 15 animals examined. Scale bar, 40  $\mu$ m. **c** Representative images showing adults expressing only GBP::SAX-7 in hmc. Similar expression patterns were observed in all 15 animals examined. Scale bar, 40  $\mu$ m.

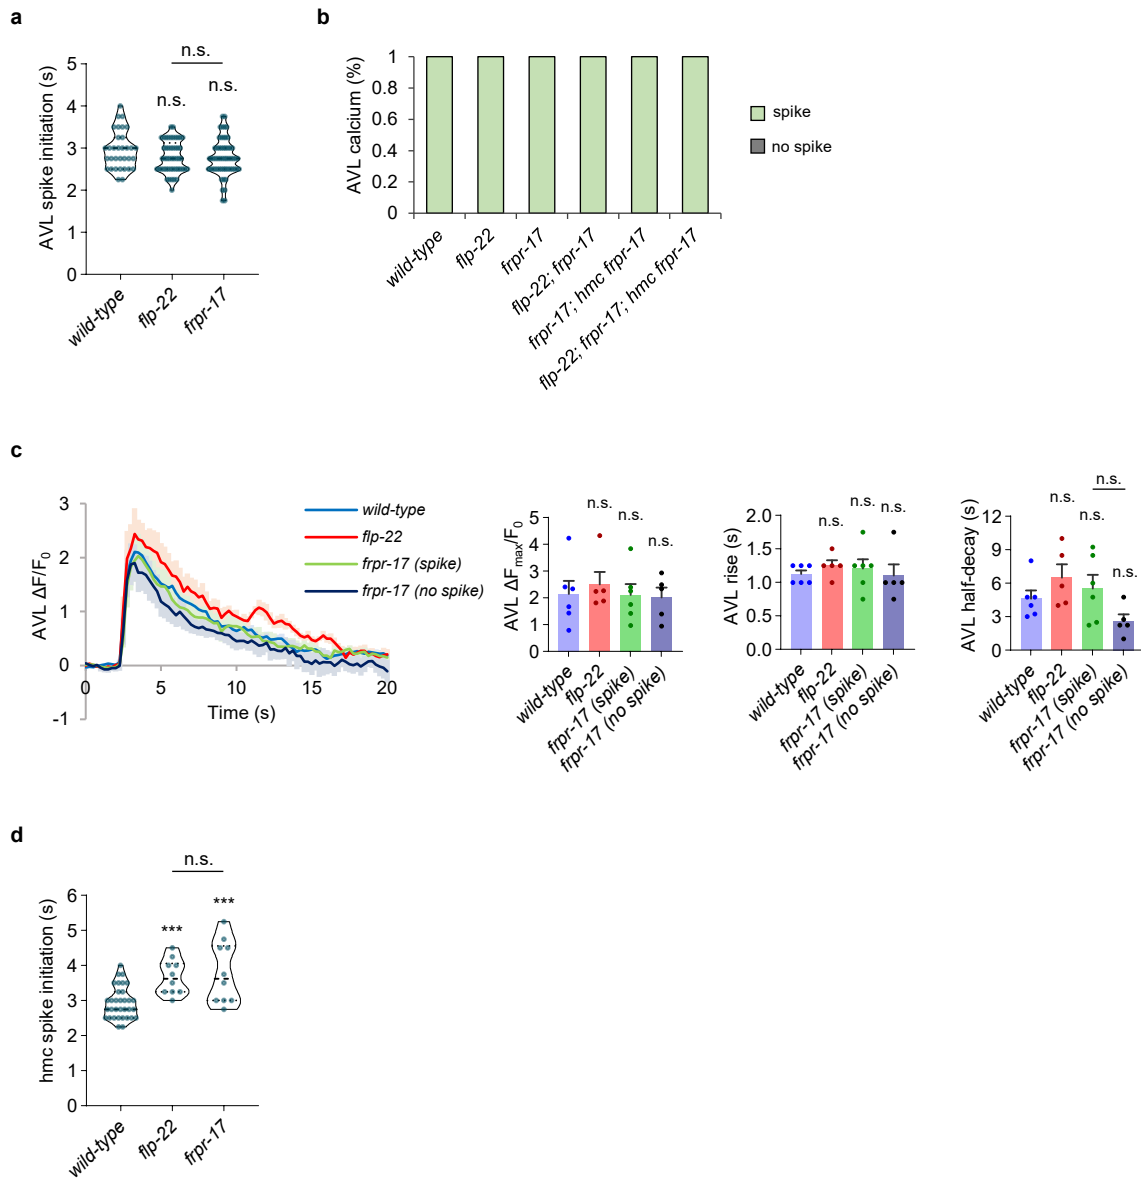

**Supplementary Figure 5: *flp-22* and *frpr-17* mutants do not alter calcium dynamics in AVL.** **a** Violin plots of calcium spike initiation time in hmc after the end of intestinal calcium oscillation. Dashed line refers median and dotted lines refer quartiles. One-way ANOVA with Bonferroni's correction for multiple comparisons; n.s., not significant. **b** Quantification of the number of calcium spikes observed in AVL during DMP in adult animals of the indicated genotypes. "*hmc frpr-17*" denotes expressing *frpr-17* cDNA under the *nmur-3*( $\Delta$ ) promoter. For a, b, and d, wild-type: 33 cycles in 8 animals, *flp-22*: 49 cycles in 9 animals, *frpr-17*: 56 cycles in 13 animals, *flp-22; frpr-17*: 43 cycles in 9 animals, *frpr-17; hmc frpr-17*: 20 cycles in 7 animals, *flp-22; frpr-17; hmc frpr-17*: 42 cycles in 9 animals. **c Left**: traces of calcium dynamics in AVL aligned to the calcium spike initiation time. Solid lines indicate average fold change in GCaMP intensity and shades indicate SEM. **Right**: quantification of average peak amplitudes, rise times and decay times from the traces on the right. Data are presented as mean values  $\pm$  SEM.  $n = 6, 5, 6, 5$  cycles from different animals. One-way ANOVA with Bonferroni's correction for multiple comparisons; n.s., not significant. **d** Violin plots of calcium spike initiation time in hmc after the end of intestinal calcium oscillation. Dashed line refers median and dotted lines refer quartiles. \*\*\*  $P < 0.001$  in one-way ANOVA with Bonferroni's correction for multiple comparisons; n.s., not significant.

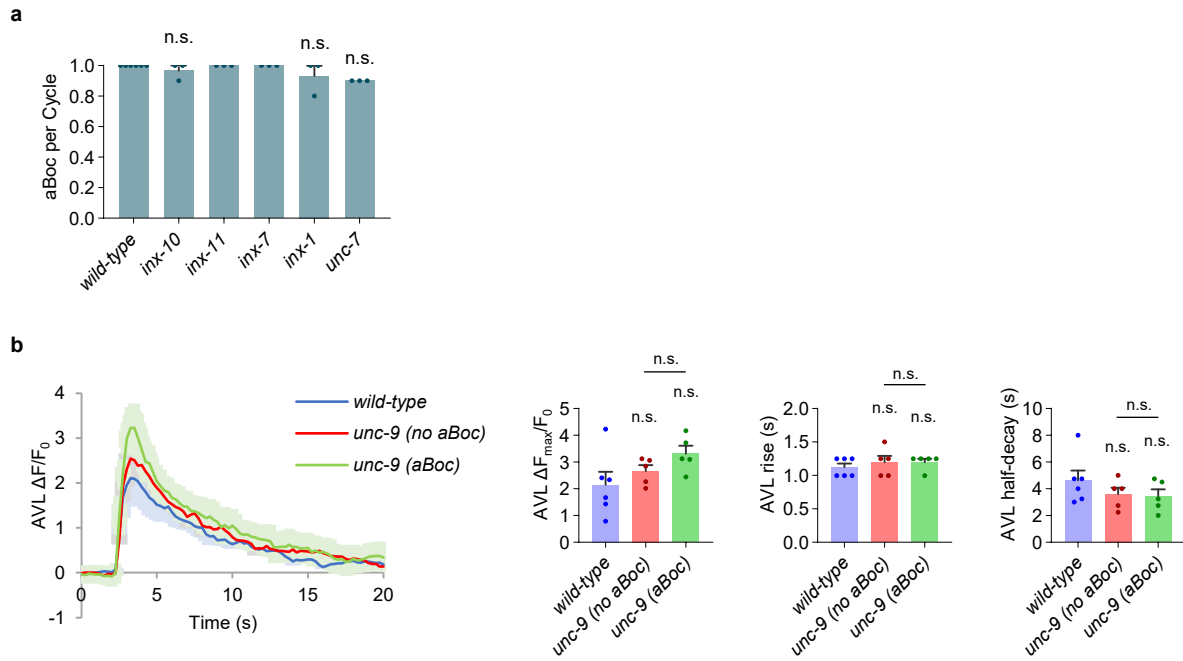

**Supplementary Figure 6: aBoc frequency of innexin mutants and calcium dynamics in *unc-9* mutants.** **a** aBoc frequencies of the indicated genotypes. Data are presented as mean values  $\pm$  SEM.  $n = 6, 3, 3, 3, 3, 3$  independent animals. One-way ANOVA with Dunnett's correction for multiple comparisons; n.s., not significant. **b Left:** average traces of calcium dynamics in AVL or hmc aligned to the calcium spike initiation time in the indicated mutants. Solid lines indicate average fold change in GCaMP intensity and shades indicate SEM. *unc-9 (no aBoc)* refers to cycles with calcium spike followed by no aBoc and *unc-9 (aBoc)* refers to cycles with calcium spike followed by aBoc. **Right:** quantification of the average peak amplitude, rise time, and half-decay time. Data are presented as mean values  $\pm$  SEM.  $n = 6, 5, 5$  cycles from different animals. One-way ANOVA with Bonferroni's correction for multiple comparisons; n.s., not significant.



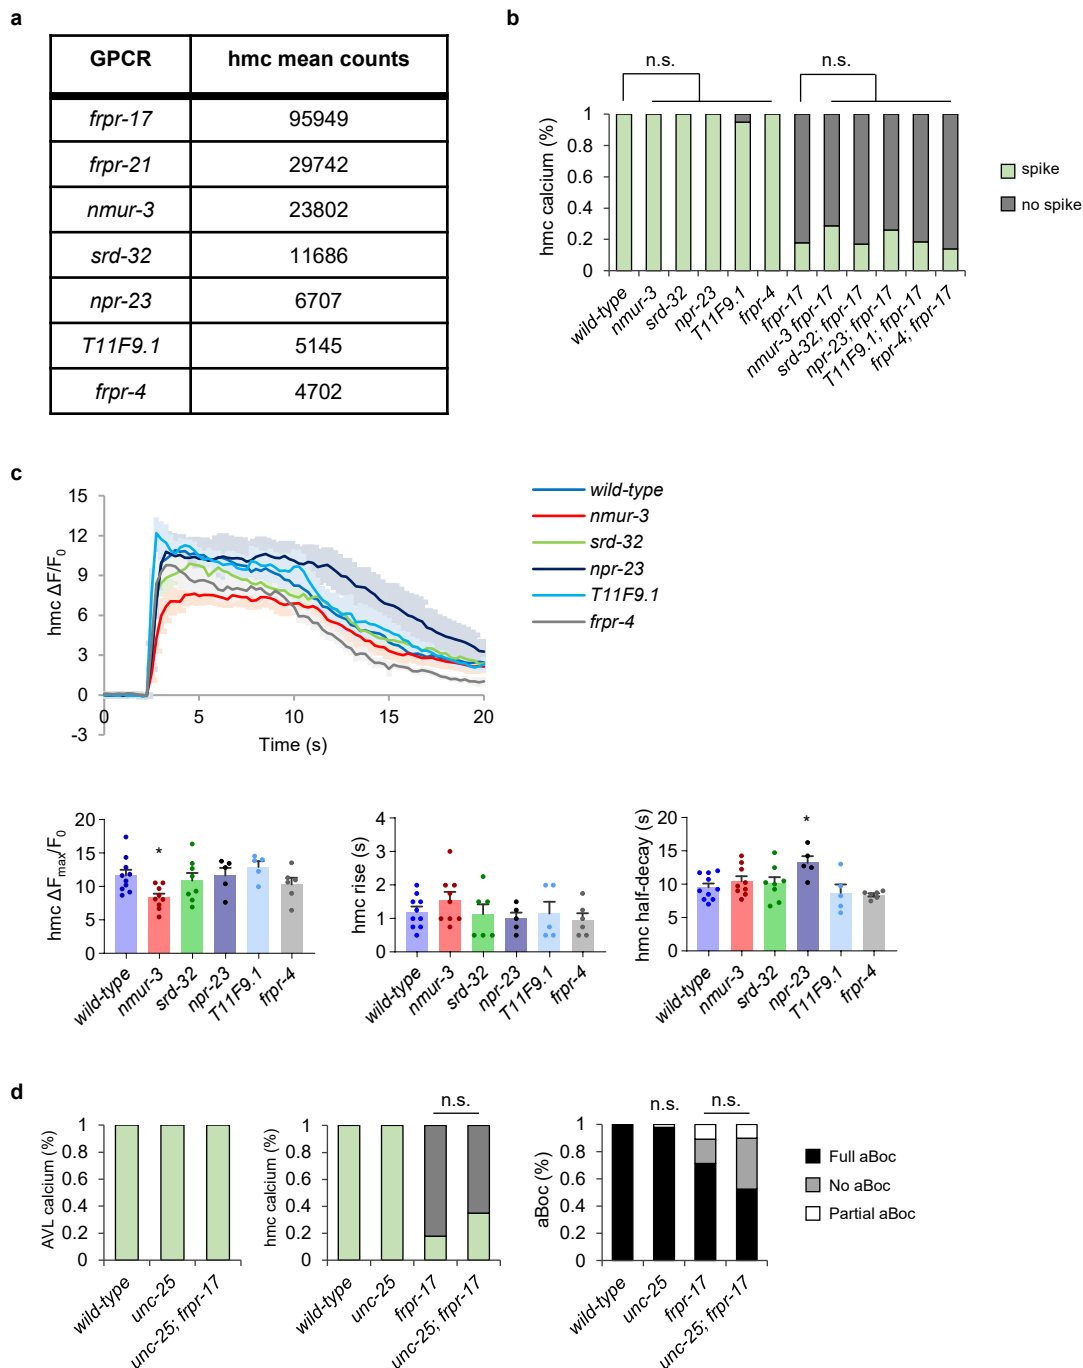

**Supplementary Figure 7: aBoc frequency and calcium dynamics of receptors highly expressed in hmc.** **a** Table of the GPCRs highly expressed in hmc and their relative abundance (adapted from [1]). **b** Quantification of the number of calcium spikes observed in hmc in each cycle in adult animals of the indicated genotypes. Wild-type: 33 cycles in 8 animals, *nmur-3*: 21 cycles in 7 animals *srd-32*: 25 cycles in 9 animals, *npr-23*: 23 cycles in 6 animals, *T11F9.1*: 20 cycles in 9 animals, *frpr-17*: 56 cycles in 13 animals, *nmur-3 frpr-17*: 49 cycles in 9 animals, *srd-32; frpr-17*: 47 cycles in 10 animals, *npr-23; frpr-17*: 27 cycles in 7 animals, *T11F9.1; frpr-17*: 49 cycles in 9 animals, *frpr-4; frpr-17*: 43 cycles in 9 animals. Two-sided chi-square test with Bonferroni's correction for multiple comparisons; n.s., not significant. **c** *Above*: average traces of calcium dynamics in hmc aligned to the calcium spike initiation time. Solid lines indicate average fold change in GCaMP intensity and shades indicate standard errors. *Below*: quantification of the average peak amplitude, rise time, and half-decay time. Data are presented as mean values  $\pm$  SEM.  $n = 10, 9, 8, 5, 5, 6$  cycles from different animals. \*  $P < 0.05$  in one-way ANOVA with Dunnett's correction for multiple comparisons. **d** Quantification of the frequency of calcium spikes observed in AVL and hmc and aBocs from time lapse images of the indicated genotypes. Wild-type: 33 cycles in 8 animals, *unc-25*: 46 cycles in 7 animals *unc-25; frpr-17*: 40 cycles in 6 animals. Two-sided chi-square test with Bonferroni's correction for multiple comparisons; n.s., not significant.

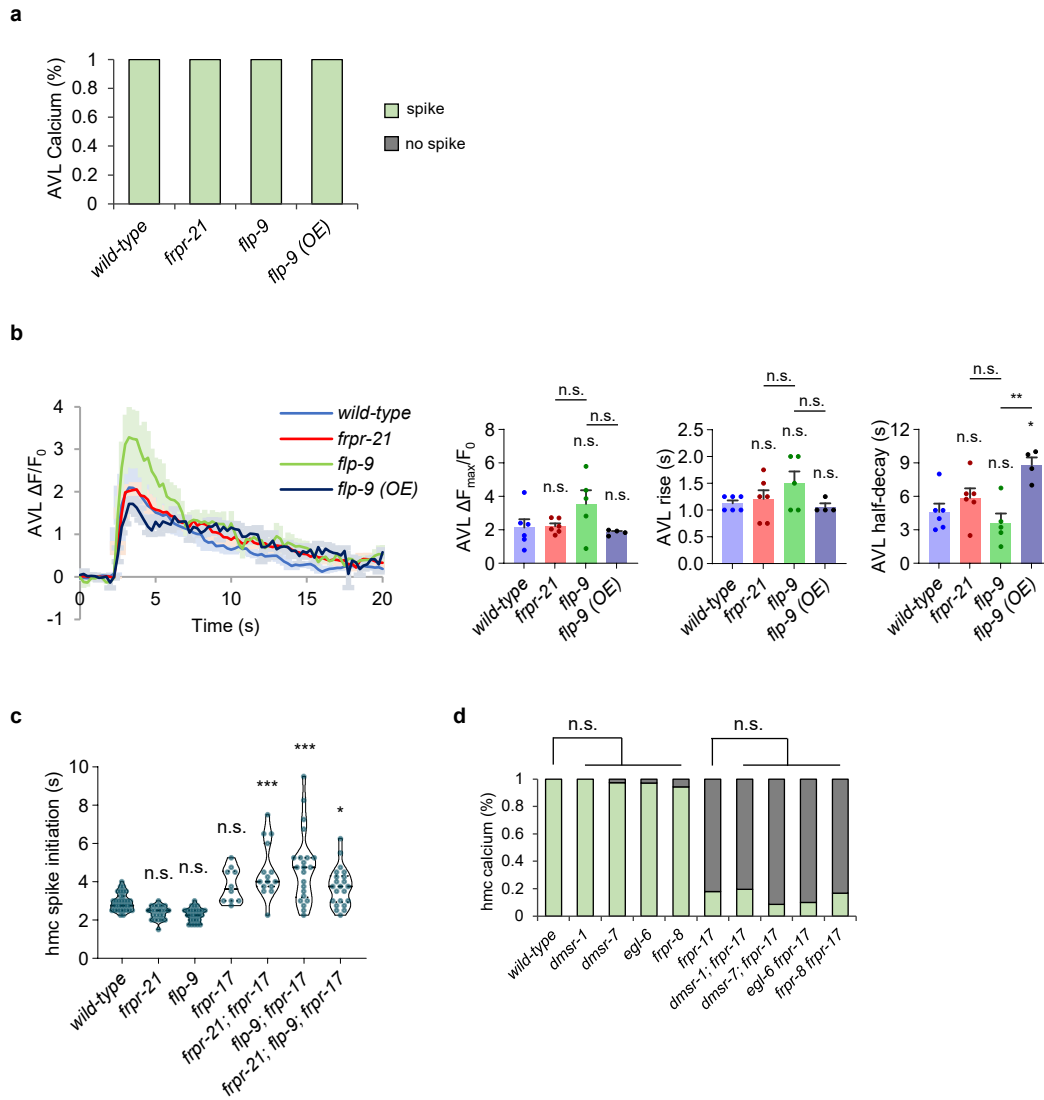

**Supplementary Figure 8: Calcium dynamics in *flp-9* mutants and putative *flp-9* GPCR mutants. **a** Quantification of the number of calcium spikes observed in AVL in each cycle in adult animals of the indicated genotypes. Wild-type: 33 cycles in 8 animals, *frpr-21*: 23 cycles in 9 animals, *flp-9*: 27 cycles in 8 animals, *flp-9 (OE)*: 27 cycles in 5 animals. **b Left**: average traces of calcium dynamics in AVL aligned to the calcium spike initiation time in the indicated mutants. The solid lines indicate average fold change in GCaMP intensity and the shades indicate SEM. **Right**: quantification of the average peak amplitude, rise time, and half-decay time. Data are presented as mean values  $\pm$  SEM.  $n = 6, 6, 5, 4$  cycles from different animals. \*  $P < 0.05$  in one-way ANOVA with Bonferroni's correction for multiple comparisons; n.s., not significant. **c** Violin plots of calcium spike initiation time in hmc after the end of intestinal calcium oscillation. Dashed line refers median and dotted lines refer quartiles. \*\*\*  $P < 0.001$  and \*\*  $P < 0.01$  in one-way ANOVA with Dunnett's correction for multiple comparisons; n.s., not significant. **d** Quantification of the number of calcium spikes observed in hmc in each cycle in adult animals of the indicated genotypes. Wild-type: 33 cycles in 8 animals, *dmsr-1*: 30 cycles in 5 animals, *dmsr-7*: 36 cycles in 5 animals, *egl-6*: 34 cycles in 5 animals, *frpr-8*: 35 cycles in 6 animals, *frpr-17*: 56 cycles in 13 animals, *dmsr-1; frpr-17*: 41 cycles in 7 animals, *dmsr-7; frpr-17*: 47 cycles in 7 animals, *egl-6 frpr-17*: 40 cycles in 7 animals, *frpr-8 frpr-17*: 24 cycles in 7 animals. Two-sided chi-square test with Bonferroni's correction for multiple comparisons; n.s., not significant.**

**Supplementary Table 1: Strains, transgenic lines, and plasmids used in this study**

| Strain | Genotype                                                                        | Figures                                                              | Source     |
|--------|---------------------------------------------------------------------------------|----------------------------------------------------------------------|------------|
| N2     | Wild-type Bristol strain                                                        | Fig. 1, Fig. S2a, b, d, e, f, Fig. 3a, Fig. 4b, Fig. S5A, Fig. 5A, D |            |
| OJ794  | <i>nlp-40(tm4085) I</i>                                                         | Fig. 1b                                                              | [2]        |
| OJ6846 | <i>aex-2(vj304) X</i>                                                           | Fig. 1b                                                              | This paper |
| OJ3271 | <i>flp-22(vj229) I</i>                                                          | Fig. 1c, Fig. S2b, d, e, f<br>Fig. 5a                                | This paper |
| OJ6057 | <i>frpr-17(vj265) X</i>                                                         | Fig. 1c, Fig. S2b, d, e, f                                           | This paper |
|        | <i>flp-22(vj229) I; frpr-17(vj265) X</i>                                        | Fig. 1c                                                              | This paper |
| OJ6754 | <i>hlh-8(nr2061) X</i>                                                          | Fig. 1d                                                              | This paper |
| OJ7173 | <i>flp-22(vj229) I; hlh-8(nr2061) X</i>                                         | Fig. 1d                                                              | This paper |
| OJ1218 | <i>unc-25(e156) III</i>                                                         | Fig. S2a                                                             | This paper |
| OJ2424 | <i>egl-3(nr2090) V</i>                                                          | Fig. S2a, b, e, f                                                    | This paper |
| OJ5308 | <i>frpr-17(vj249) X</i>                                                         | Fig. S2a                                                             | This paper |
| OJ3584 | <i>egl-30(ad806) I</i>                                                          | Fig. 3a                                                              | This paper |
| OJ8203 | <i>unc-9(e101) X</i>                                                            | Fig. 4b                                                              | This paper |
| OJ2451 | <i>inx-10(ok2714) V</i>                                                         | Fig. S6a                                                             | This paper |
| OJ4154 | <i>inx-11(ok2783) V</i>                                                         | Fig. S5a                                                             | This paper |
| OJ9407 | <i>inx-7(ok2319) IV</i>                                                         | Fig. S5a                                                             | This paper |
| OJ2446 | <i>inx-1(tm3524) X</i>                                                          | Fig. S5a                                                             | [3]        |
| OJ3650 | <i>unc-7(e5) X</i>                                                              | Fig. S5a                                                             | This paper |
| OJ7399 | <i>frpr-21(tm4669) II</i>                                                       | Fig. 5a, Fig. S2e, f                                                 | This paper |
| OJ6524 | <i>flp-22(vj229) I; frpr-21(tm4669) II</i>                                      | Fig. 5a                                                              | This paper |
| OJ3844 | <i>flp-9(yn36) IV</i>                                                           | Fig. 5e, Fig. S2e, f                                                 | This paper |
| OJ7009 | <i>vjEx2445 [pMH569 (Pnmur-3(1kb)::ICE), 10 ng/μL]</i>                          | Fig. 1b                                                              | This paper |
| OJ1626 | <i>nlp-40(tm4085) I; vjEx368 [pHW61 (Pges-1::nlp-40 cDNA), 25 ng/μL]</i>        | Fig. 1b                                                              | [2]        |
| OJ9177 | <i>aex-2(vj304) X; vjEx3004 [pDS728 (Pnmur-3(1kb)::aex-2 cDNA), 10 ng/μL]</i>   | Fig. 1b                                                              | This paper |
| OJ7011 | <i>vjEx2447 [pDS729 (Pnmur-3(1kb)::TeTx), 10 ng/μL]</i>                         | Fig. 1b                                                              | This paper |
| OJ9314 | <i>flp-22(vj229) I; vjEx1837 [pHM363 (Punc-47::flp-22 cDNA), 25 ng/μL]</i>      | Fig. 1c                                                              | This paper |
| OJ5082 | <i>flp-22(vj229) I; vjEx1534 [pHM184 (Punc-129::flp-22 cDNA), 25 ng/μL]</i>     | Fig. 1c                                                              | This paper |
| OJ7439 | <i>flp-22(vj229) I; vjEx2466 [pDS747 (Pnmur-3(1kb)::flp-22 cDNA), 10 ng/μL]</i> | Fig. 1c                                                              | This paper |
| OJ9395 | <i>frpr-17(vj249) X; vjEx1596 [pDS573 (Prab-3::frpr-17 cDNA), 5 ng/μL]</i>      | Fig. 1c                                                              | This paper |
| OJ5372 | <i>frpr-17(vj249) X; vjEx1580 [pDS567 (Pmyo-3::frpr-17 cDNA) 10 ng/μL]</i>      | Fig. 1c                                                              | This paper |
| OJ9396 | <i>frpr-17(vj265) X; vjEx2830 [pUC259 (Pnmur-3(Δ)::frpr-17 cDNA) 25 ng/μL]</i>  | Fig. 1c                                                              | This paper |

|        |                                                                                                                                       |                                                                                                              |            |
|--------|---------------------------------------------------------------------------------------------------------------------------------------|--------------------------------------------------------------------------------------------------------------|------------|
| OJ6607 | <i>vjEx2174 [pUC168 (Pnmur-3::GFP) 50 ng/μL]</i>                                                                                      | Fig. 1d, Fig. S1                                                                                             | This paper |
| OJ7659 | <i>vjEx2653 [pUC249 (Pnmur-3(Δ)::ICE), 25 ng/μL]</i>                                                                                  | Fig. 1d                                                                                                      | This paper |
| OJ7716 | <i>frpr-17(vj265) X; vjEx2653 [pUC249 (Pnmur-3(Δ)::ICE), 25 ng/μL]</i>                                                                | Fig. 1d                                                                                                      | This paper |
| OJ7656 | <i>vjEx2651 [pUC246 (Pnmur-3(Δ)::PH domain::miniSOG::SL2::mCherry), 25 ng/μL]</i>                                                     | Fig. 1d                                                                                                      | This paper |
| OJ6889 | <i>otIs348; vjEx2349 [pUC214 (Pnmur-3(1kb)::GFP) 2 ng/μL]</i>                                                                         | Fig. S1                                                                                                      | This paper |
| OJ7018 | <i>vjEx2454 [pUC218 (Pnmur-3(Δ)::GFP) 50 ng/μL]</i>                                                                                   | Fig. S1                                                                                                      | This paper |
| OJ7149 | <i>egl-3(nr2090) V; vjEx2535 [pMH576 (Pnmur-3(1kb)::egl-3::Venus) 5 ng/μL]</i>                                                        | Fig. S2a                                                                                                     | This paper |
| OJ6220 | <i>frpr-17(vj265); vjEx1926 [pUC163 (Parg-1::Pegl-18::frpr-17 cDNA::mCherry) 50 ng/μL]</i>                                            | Fig. S2a                                                                                                     | This paper |
| OJ8149 | <i>lite-1(ce314) gur-3(ok2245) X; vjEx2548 [pUC191 (Pnmur-3(3kb)::GCaMP6) 12 ng/μL + pHW107 (Pnlp-40::GCaMP3) 10 ng/μL]</i>           | Fig. 2, Fig. S2b, d, Fig. S3b-d, Fig. S5, Fig. 3b-e, Fig. 4d-f, Fig. S6b, Fig. 5b, c, f, Fig. S7b-d, Fig. S8 | This paper |
| OJ9089 | <i>lite-1(ce314) gur-3(ok2245) X; vjEx2548; vjEx2957 [pMH569 (Pnmur-3(1kb)::ICE) 10 ng/μL]</i>                                        | Fig. 2d                                                                                                      | This paper |
| OJ9397 | <i>lite-1(ce314) gur-3(ok2245) aex-2(vj302) X; vjEx2548</i>                                                                           | Fig. 2d, e                                                                                                   | This paper |
| OJ9398 | <i>lite-1(ce314) gur-3(ok2245) aex-2(vj302) X; vjEx2548; vjEx2985 [pDS728 (Pnmur-3(1kb)::aex-2 cDNA) 7 ng/μL]</i>                     | Fig. 2d, e                                                                                                   | This paper |
| OJ8231 | <i>flp-22(vj229) I; lite-1(ce314) gur-3(ok2245) X; vjEx2548</i>                                                                       | Fig. 2f, g, Fig. S3b, Fig. S5                                                                                | This paper |
| OJ9634 | <i>flp-22(vj229) I; lite-1(ce314) gur-3(ok2245) X; vjEx2548; vjEx3125 [pDS747 (Pnmur-3(1kb)::flp-22 cDNA) 10 ng/μL]</i>               | Fig. 2f                                                                                                      | This paper |
| OJ8229 | <i>lite-1(ce314) gur-3(ok2245) frpr-17(vj265) X; vjEx2548</i>                                                                         | Fig. 2f, g, Fig. S3b, Fig. S5, Fig. 3b, c, e, Fig. 5b, c, Fig. S7b, d, Fig. S8c, d                           | This paper |
| OJ9399 | <i>flp-22(vj229) I; lite-1(ce314) gur-3(ok2245) frpr-17(vj265) X; vjEx2548</i>                                                        | Fig. 2f, Fig. S3b, Fig. S5b                                                                                  | This paper |
| OJ8725 | <i>lite-1(ce314) gur-3(ok2245) frpr-17(vj265) X; vjEx2548; vjEx2830 [pUC259 (Pnmur-3(Δ)::frpr-17 cDNA) 25 ng/μL]</i>                  | Fig. 2f, Fig. S5b                                                                                            | This paper |
| OJ8783 | <i>flp-22(vj229) I; lite-1(ce314) gur-3(ok2245) frpr-17(vj265) X; vjEx2548; vjEx2830 [pUC259 (Pnmur-3(Δ)::frpr-17 cDNA) 25 ng/μL]</i> | Fig. 2f, Fig. S5b                                                                                            | This paper |
| OJ9721 | <i>lite-1(ce314) gur-3(ok2245) X; vjEx3153 [pUC297 (Pnmur-3(Δ)::GCaMP6::SL2::mCherry) 12 ng/μL]</i>                                   | Fig. S3a                                                                                                     | This paper |
| OJ9711 | <i>unc-54(e1108) I; vjEx2548</i>                                                                                                      | Fig. S3c, d                                                                                                  | This paper |
| OJ7370 | <i>vjEx2589 [pDS788 (Pnmur-3(1kb)::flp-22::pHluorin::flp-22)]</i>                                                                     | Fig. S4a                                                                                                     | This paper |
| OJ8077 | <i>unc-32(e189) III; vjEx2589 [pDS788 (Pnmur-3(1kb)::flp-22::pHluorin::flp-22)]</i>                                                   | Fig. S4a                                                                                                     | This paper |
| OJ9320 | <i>vjEx2589 [pDS788 (Pnmur-3(1kb)::flp-22::pHluorin::flp-22) 5 ng/μL]; vjEx3038 [pDS834 (Pnmur-3(Δ)::GBP::sax-7) 20 ng/μL]</i>        | Fig. S4b, c                                                                                                  | This paper |
| OJ8127 | <i>vjEx2749 [pUC247 (Pnmur-3(Δ)::kin-2a(G310D)) 50 ng/μL]</i>                                                                         | Fig. 4a                                                                                                      | This paper |

|        |                                                                                                                                                                                          |                        |            |
|--------|------------------------------------------------------------------------------------------------------------------------------------------------------------------------------------------|------------------------|------------|
| OJ9150 | <i>lite-1(ce314) gur-3(ok2245) X; vjEx2548; vjEx2987 [pUC247 (Pnmur-3(Δ)::kin-2a(G310D)) 50 ng/μL]</i>                                                                                   | Fig. 3b-e              | This paper |
| OJ8824 | <i>lite-1(ce314) gur-3(ok2245) frpr-17(vj265) X; vjEx2548; vjEx2871 [pUC273 (Pnmur-3(Δ)::kin-1a(H96Q,W205R)) 25 ng/μL]</i>                                                               | Fig. 3b-e              | This paper |
| OJ9714 | <i>unc-9(e101) X; vjEx3150 [pUC291 (Pnmur-3(Δ)::unc-9 cDNA::mTurquoise2) 25 ng/μL]</i>                                                                                                   | Fig. 4b                | This paper |
| OJ9148 | <i>unc-9(e101) X; vjEx3000 [pUC258 (Pmyo-3::unc-9 cDNA) 10 ng/μL]</i>                                                                                                                    | Fig. 4b                | This paper |
| OJ9356 | <i>vjEx3049 [pUC265 (Pnmur-3(Δ)::frpr-17 cDNA::Venus) 20 ng/μL + pUC291 (Pnmur-3(Δ)::unc-9 cDNA::linker::mTurquoise2) 20 ng/μL + pDS833 (Pnmur-3(Δ)::wdr-23b NLS::mCherry) 20 ng/μL]</i> | Fig. 4c                | This paper |
| OJ8578 | <i>lite-1(ce314) gur-3(ok2245) unc-9(e101) X; vjEx2548</i>                                                                                                                               | Fig. 4d-f, Fig. S6b    | This paper |
| OJ8615 | <i>frpr-21(tm4669) II; lite-1(ce314) gur-3(ok2245) X; vjEx2548</i>                                                                                                                       | Fig. 5b, c, Fig. S8a-c | This paper |
| OJ8635 | <i>frpr-21(tm4669) II; lite-1(ce314) gur-3(ok2245) frpr-17(vj265) X; vjEx2548</i>                                                                                                        | Fig. 5b, c, Fig. S8c   | This paper |
| OJ8740 | <i>frpr-21(tm4669) II; lite-1(ce314) gur-3(ok2245) frpr-17(vj265) X; vjEx2548; vjEx2838 [pUC276 (Pnmur-3(Δ)::frpr-21 cDNA) 25 ng/μL]</i>                                                 | Fig. 5b                | This paper |
| OJ8976 | <i>flp-9(yn36) IV; lite-1(ce314) gur-3(ok2245) frpr-17(vj265) X; vjEx2548</i>                                                                                                            | Fig. 5b, c, Fig. S8c   | This paper |
| OJ9653 | <i>flp-9(yn36) IV; lite-1(ce314) gur-3(ok2245) frpr-17(vj265) X; vjEx2548; vjEx3128 [pMH189 (Pflp-9::flp-9 cDNA) 25 ng/μL]</i>                                                           | Fig. 5b                | This paper |
| OJ9652 | <i>flp-9(yn36) IV; lite-1(ce314) gur-3(ok2245) frpr-17(vj265) X; vjEx2548; vjEx2867 [pMH351 (Punc-47::flp-9 cDNA) 25 ng/μL]</i>                                                          | Fig. 5b                | This paper |
| OJ8977 | <i>frpr-21(tm4669) II; flp-9(yn36) IV; lite-1(ce314) gur-3(ok2245) frpr-17(vj265) X; vjEx2548</i>                                                                                        | Fig. 5b, Fig. S8c      | This paper |
| OJ8875 | <i>vjEx2899 [pUC281 (Pnmur-3(Δ)::frpr-21 cDNA::GFP) 25 ng/μL]</i>                                                                                                                        | Fig. 5d                | This paper |
| OJ5929 | <i>vjEx1785 [pMH351 (Punc-47::flp-9 cDNA) 25 ng/μL]</i>                                                                                                                                  | Fig. 5e                | This paper |
| OJ6572 | <i>frpr-21(tm4669) II; vjEx1785 [pMH351 (Punc-47::flp-9 cDNA) 25 ng/μL]</i>                                                                                                              | Fig. 5e                | This paper |
| OJ8975 | <i>flp-9(yn36) IV; lite-1(ce314) gur-3(ok2245) X; vjEx2548</i>                                                                                                                           | Fig. 5c, f, Fig. S8a-c | This paper |
| OJ8856 | <i>lite-1(ce314) gur-3(ok2245) X; vjEx2548; vjEx2867 [pMH351 (Punc-47::flp-9 cDNA) 25 ng/μL]</i>                                                                                         | Fig. 5f, Fig. S8a, b   | This paper |
| OJ8857 | <i>frpr-21(tm4669) II; lite-1(ce314) gur-3(ok2245) X; vjEx2548; vjEx2867 [pMH351 (Punc-47::flp-9 cDNA) 25 ng/μL]</i>                                                                     | Fig. 5f                | This paper |
| OJ9400 | <i>lite-1(ce314) gur-3(ok2245) X; vjEx2548; vjEx2838 [pUC276 (Pnmur-3(Δ)::frpr-21 cDNA) 25 ng/μL]</i>                                                                                    | Fig. 5f                | This paper |
| OJ9017 | <i>frpr-21(tm4669) II; lite-1(ce314) gur-3(ok2245) X; vjEx2548; vjEx2838 [pUC276 (Pnmur-3(Δ)::frpr-21 cDNA) 25 ng/μL]</i>                                                                | Fig. 5f                | This paper |
| OJ8202 | <i>lite-1(ce314) gur-3(ok2245) nmur-3(vj353) X; vjEx2548</i>                                                                                                                             | Fig. S7b, c            | This paper |
| OJ8579 | <i>lite-1(ce314) gur-3(ok2245) nmur-3(vj353) frpr-17(vj265) X; vjEx2548</i>                                                                                                              | Fig. S7b               | This paper |
| OJ8617 | <i>srd-32(vj308) V; lite-1(ce314) gur-3(ok2245) X; vjEx2548</i>                                                                                                                          | Fig. S7b, c            | This paper |
| OJ9403 | <i>srd-32(vj308) V; lite-1(ce314) gur-3(ok2245) frpr-17(vj265) X; vjEx2548</i>                                                                                                           | Fig. S7b               | This paper |
| OJ8618 | <i>npr-23(vj298) I; lite-1(ce314) gur-3(ok2245) X; vjEx2548</i>                                                                                                                          | Fig. S7b, c            | This paper |
| OJ8637 | <i>npr-23(vj298) I; lite-1(ce314) gur-3(ok2245) frpr-17(vj265) X; vjEx2548</i>                                                                                                           | Fig. S7b               | This paper |
| OJ8616 | <i>T11F9.1(ok2284) V; lite-1(ce314) gur-3(ok2245) X; vjEx2548</i>                                                                                                                        | Fig. S7b, c            | This paper |

|        |                                                                                  |             |            |
|--------|----------------------------------------------------------------------------------|-------------|------------|
| OJ8636 | <i>T11F9.1(ok2284) V; lite-1(ce314) gur-3(ok2245) frpr-17(vj265) X; vjEx2548</i> | Fig. S7b    | This paper |
| OJ8638 | <i>frpr-4(ok2376) II; lite-1(ce314) gur-3(ok2245) X; vjEx2548</i>                | Fig. S7b, c | This paper |
| OJ8639 | <i>frpr-4(ok2376) II; lite-1(ce314) gur-3(ok2245) frpr-17(vj265) X; vjEx2548</i> | Fig. S7b    | This paper |
| OJ9615 | <i>unc-25(e156) III; lite-1(ce314) gur-3(ok2245) X; vjEx2548</i>                 | Fig. S7d    | This paper |
| OJ9616 | <i>unc-25(e156) III; lite-1(ce314) gur-3(ok2245) frpr-17(vj265) X; vjEx2548</i>  | Fig. S7d    | This paper |
| OJ9617 | <i>dmsr-1(sy1522) V; lite-1(ce314) gur-3(ok2245) X; vjEx2548</i>                 | Fig. S8d    | This paper |
| OJ9618 | <i>dmsr-1(sy1522) V; lite-1(ce314) gur-3(ok2245) frpr-17(vj265) X; vjEx2548</i>  | Fig. S8d    | This paper |
| OJ9619 | <i>dmsr-7(sy1539) V; lite-1(ce314) gur-3(ok2245) X; vjEx2548</i>                 | Fig. S8d    | This paper |
| OJ9620 | <i>dmsr-7(sy1539) V; lite-1(ce314) gur-3(ok2245) frpr-17(vj265) X; vjEx2548</i>  | Fig. S8d    | This paper |
| OJ9586 | <i>egl-6(n4537) X; vjEx2548</i>                                                  | Fig. S8d    | This paper |
| OJ9592 | <i>egl-6(n4537) frpr-17(vj265) X; vjEx2548</i>                                   | Fig. S8d    | This paper |
| OJ9622 | <i>frpr-8(sy1362) X; vjEx2548</i>                                                | Fig. S8d    | This paper |
| OJ9629 | <i>frpr-8(sy1362) frpr-17(vj265) X; vjEx2548</i>                                 | Fig. S8d    | This paper |

**Supplementary Table 2: Oligonucleotides used in this study**

| Sequence                                                                       |         | Oligos                                              | Source     |
|--------------------------------------------------------------------------------|---------|-----------------------------------------------------|------------|
| <i>nmur-3(3kb)</i> promoter                                                    | forward | ccccccGCATGCctggtttcaagattcgggaca                   | [3]        |
|                                                                                | reverse | ccccccCCCGGGATCCgggttcaattagttgtgtca                |            |
| <i>nmur-3(1kb)</i> promoter                                                    | forward | ccccccGCATGCgctgtagcaaaatctatggtg                   | This paper |
|                                                                                | reverse | ccccccCCCGGGATCCgggttcaattagttgtgtca                |            |
| <i>nmur-3(Δ)</i> promoter                                                      | forward | ccccccGCATGCctggtttcaagattcgggaca                   | This paper |
|                                                                                | reverse | ccccccCCCGGGATCCcaacgagttgaacgtgtggt                |            |
| <i>arg-1</i> promoter                                                          | forward | ccccGCATGCaagagtttaagacgtcgca                       | This paper |
|                                                                                | reverse | ccccGGATCCctttaatgatgtctagtag                       |            |
| <i>egl-18</i> basal promoter                                                   | forward | ccccccGGATCCctccatagtagtacatTTtaaggt                | [3]        |
|                                                                                | reverse | ccccccCCCGGGatagactgtgtggagacac                     |            |
| <i>flp-9</i> promoter                                                          | forward | ccccccGCATGCgcatgatgagaacgaatttaatc                 | This paper |
|                                                                                | reverse | ccccccGGATCCttttttcttctttgaaacaaaaaatg              |            |
| <i>ICE</i>                                                                     | forward | CCCCCgctagcAAAAatggccgacaaggtcctg                   | This paper |
|                                                                                | reverse | CCCCCggtaccttaatgtcctgggaagaggttag                  |            |
| <i>TeTx</i>                                                                    | forward | CCCCCCTAGCAAAAatgcccgatcccatcaacaac                 | This paper |
|                                                                                | reverse | ccccccGCGGCCGCTtaagcggtaacggtgtacagg                |            |
| <i>flp-22</i> cDNA                                                             | forward | CCCCCgctagcAAAAATGAACCGTTCCATGATTG                  | This paper |
|                                                                                | reverse | ccccGGTACCttaATAATCCTGTTTCAGAAACTG                  |            |
| <i>frpr-17</i> cDNA                                                            | forward | ccccgctagcaaaaaATGGATGATTCCGTGGATATTTATG            | This paper |
|                                                                                | reverse | ccccggtacctCAAATAAGTACCTCTGGTTG                     |            |
| <i>PH domain::miniSOG</i>                                                      | forward | ccccccgctagcaaaaaATGGACTCGGGTAGGGACTTCC             | This paper |
|                                                                                | reverse | ccccccGCGGCCGCTtatccggaagatcctccatc                 |            |
| <i>SL2::mCherry</i>                                                            | forward | CCCCCgcgccgcgctgtctcatctactttcac                    | This paper |
|                                                                                | reverse | CCCCCggtacctTACTTGTACAGCTCGTCCA                     |            |
| <i>frpr-21</i> cDNA                                                            | forward | ccccGCTAGCaaaaATGGATCAAATAACAAGCAC                  | This paper |
|                                                                                | reverse | ccccGGTACCttACGAGCTGTTTCGTCTCG                      |            |
| <i>flp-9</i> cDNA                                                              | forward | ccccGCTAGCaaaaATGAATCAATTTTATGC                     | This paper |
|                                                                                | reverse | ccccGGTACCctaCTTTCTTCAAATCGAAC                      |            |
| <b>For 3' terminal fusion with Venus, GFP, mCherry, or linker::mTurquoise2</b> |         |                                                     |            |
| <i>wdr-23b</i> NLS                                                             | forward | CTAGCAAAAatgccttacaaaagacattcctcttcaaatctgaaaggA    | This paper |
|                                                                                | reverse | CCGGTcctttttcagatttgaagaggaatgtcttttgtaaggca tTTTTG |            |
| <i>frpr-17</i> cDNA                                                            | forward | ccccgctagcaaaaaATGGATGATTCCGTGGATATTTATG            | This paper |
|                                                                                | reverse | ccccaccggtAATAAGTACCTCTGGTTGAG                      |            |
| <i>unc-9</i> cDNA                                                              | forward | CCCCCgctagcaaaaaATGAGTATGCTATTGTATTATTTCCGG         | This paper |
|                                                                                | reverse | CCCCCaccggtCACGTGTCATTTTTCTTTC                      |            |
| <i>frpr-21</i> cDNA                                                            | forward | ccccGCTAGCaaaaATGGATCAAATAACAAGCAC                  | This paper |
|                                                                                | reverse | ccccACCGGTCGAGCTGTTTCGTCTCGATG                      |            |
| <b>For <i>flp-22</i> cDNA::pHluorin::<i>flp-22</i> cDNA</b>                    |         |                                                     |            |
| <i>flp-22</i> 5' fragment                                                      | forward | CCCCCgctagcAAAAATGAACCGTTCCATGATTG                  | This paper |
|                                                                                | reverse | GACGGGGAcctaggcttACCGGTACCGAATCGCATCCATTTGG         |            |
| <i>flp-22</i> 3' fragment                                                      | forward | GATTCGGTACCGGTAagcctaggTCCCCGTGACCCAAATGG           | This paper |
|                                                                                | reverse | ccccGGTACCttaATAATCCTGTTTCAGAAACTG                  |            |
| <i>pHluorin</i>                                                                | forward | ccccccACCGGTAGTAAAGGAGAAGAACTTTTC                   | This paper |
|                                                                                | reverse | CCCCCctaggTTTGTATAGTTCATCCATGCC                     |            |

## Supplementary References

- 1 Mathies, L. D. *et al.* mRNA profiling reveals significant transcriptional differences between a multipotent progenitor and its differentiated sister. *BMC Genomics* **20**, 427, doi:10.1186/s12864-019-5821-z (2019).
- 2 Wang, H. *et al.* Neuropeptide secreted from a pacemaker activates neurons to control a rhythmic behavior. *Curr Biol* **23**, 746-754, doi:10.1016/j.cub.2013.03.049 (2013).
- 3 Choi, U., Wang, H., Hu, M., Kim, S. & Sieburth, D. Presynaptic coupling by electrical synapses coordinates a rhythmic behavior by synchronizing the activities of a neuron pair. *Proc Natl Acad Sci U S A* **118**, doi:10.1073/pnas.2022599118 (2021).
